# Supplementary material
Source: MDPI journal article supplement (https://www.mdpi.com/2071-1050/13/10/5627)
Supplement: s1 [file s1]

## Supplementary Materials

**Table S1.** Investment and O&M cost parameters used in SETA for population interval Pop 3 ( $\geq 10\,000$  PE)

| Unitary Processes                                             | Investment cost (USD.PE <sup>-1</sup> ) |       |           |           |       | O&M cost (USD.PE <sup>-1</sup> .yr. <sup>-1</sup> ) |        |      |      |
|---------------------------------------------------------------|-----------------------------------------|-------|-----------|-----------|-------|-----------------------------------------------------|--------|------|------|
|                                                               | k                                       | n     | a         | b         | c     | d                                                   | e      | f    | g    |
| W1 Septic tank                                                | -                                       | -     | -         | -         | -     | 0.42                                                | 3167.6 | -    | -    |
| W2 Imhoff tank                                                | -                                       | -     | -         | -         | -     | 0.42                                                | 3167.6 | -    | -    |
| W3 Primary clarifier                                          | 1.164                                   | 1.01  | -         | -         | -     | 0.42                                                | 3167.6 | -    | -    |
| W4 UASB reactor                                               | 30                                      | 1     | -         | -         | -     | 0.42                                                | 3167.6 | -    | -    |
| W5 Trickling filter (low rate)                                | 190.4                                   | 0.935 | -         | -         | -     | 0.83                                                | 31676  | -    | -    |
| W6 Trickling filter (medium-high rate)                        | 46.53                                   | 1     | -         | -         | -     | 6.2                                                 | 33511  | -    | -    |
| W7 Activated sludge reactor (extended aeration)               | 1.13E+29                                | -5.56 | -         | -         | -     | -                                                   | -      | 30.5 | 0.85 |
| W8 Activated sludge reactor (conventional-high rate aeration) | 46.53                                   | 1     | -         | -         | -     | 7.87                                                | 31676  | -    | -    |
| W9 Combined reactor for nitrification/denitrification         | 2584.1                                  | 0.7   | -         | -         | -     | -                                                   | -      | 30.5 | 0.85 |
| W10 Anoxic + Aeration tank                                    | 2586                                    | 0.7   | -         | -         | -     | -                                                   | -      | 32   | 0.85 |
| W11 Anaerobic pond                                            | 20                                      | 1     | -         | -         | -     | 0.51                                                | -      | -    | -    |
| W12 Facultative pond                                          | 25                                      | 1     | -         | -         | -     | 0.51                                                | -      | -    | -    |
| W13 Aerated pond                                              | 30                                      | 1     | -         | -         | -     | 0.6                                                 | -      | -    | -    |
| W14 Settling pond                                             | 7                                       | 1     | -         | -         | -     | 0.17                                                | -      | -    | -    |
| W15 Anaerobic + Facultative pond                              | 42.5                                    | 1     | -         | -         | -     | 0.41                                                | -      | -    | -    |
| W16 Anaerobic + Aerated pond                                  | 45                                      | 1     | -         | -         | -     | 0.54                                                | -      | -    | -    |
| W17 Facultative pond + Floating macrophytes                   | 30                                      | 1     | -         | -         | -     | 1.25                                                | -      | -    | -    |
| W18 Constructed wetland                                       | -                                       | -     | 5.00E-06  | -0.3      | 24939 | 1.25                                                | -      | -    | -    |
| W19 Secondary clarifier                                       | -                                       | -     | 1.50E-04  | 8         | 7622  | -                                                   | -      | -    | -    |
| W20 Fine/Micro Stepscreen + chlorine disinfection             | 0.06                                    | 1     | -         | -         | -     | 0.1                                                 | -      | -    | -    |
| W21 Maturation pond                                           | -                                       | -     | 5.00E-04  | 35.8      | 4238  | 0.05                                                | -      | -    | -    |
| W22 Soil infiltration                                         | -                                       | -     | -         | -         | -     | 0.1                                                 | -      | -    | -    |
| WS1 Gravity sludge thickener                                  | -                                       | -     | 2.70E-04  | 0.7       | 14662 | 0.1                                                 | -      | -    | -    |
| WS2 Chemical sludge stabilization                             | 0.552                                   | 1     | -         | -         | -     | 0.1                                                 | -      | -    | -    |
| WS3 Mechanical dewatering                                     | -                                       | -     | 1.30E-03  | -<br>14.7 | 78989 | 0.15                                                | -      | -    | -    |
| WS4 Drying bed                                                | -                                       | -     | 1.50E-04  | 18        | 2853  | 0.08                                                | -      | -    | -    |
| FS1 Anaerobic pond/tank                                       | -                                       | -     | 2.00E-07  | 0.6       | 30000 | -                                                   | -      | 0.05 | 0.4  |
| FS2 Underground sludge reception tank                         | -                                       | -     | -7.00E-07 | 0.8       | 47635 | -                                                   | -      | 0.1  | 0.4  |

| Unitary Processes                             | Investment cost (USD.PE <sup>-1</sup> ) |      |          |      |       | O&M cost (USD.PE <sup>-1</sup> .yr. <sup>-1</sup> ) |   |      |     |
|-----------------------------------------------|-----------------------------------------|------|----------|------|-------|-----------------------------------------------------|---|------|-----|
|                                               | k                                       | n    | a        | b    | c     | d                                                   | e | f    | g   |
| FS3 Drying bed                                | -                                       | -    | 3.00E-07 | 2.6  | 12391 | -                                                   | - | 0.05 | 0.4 |
| FS4 Sludge composting hangar                  | -                                       | -    | 1.00E-07 | 1.3  | 26212 | -                                                   | - | 0.1  | 0.4 |
| FS5 Chemical sludge stabilization             | 1.75E+05                                | 0    | -        | -    | -     | -                                                   | - | 0.1  | 0.4 |
| FS6 Gravity thickener + mechanical dewatering | 13866                                   | 0.39 | -        | -    | -     | 0.07                                                | - | -    | -   |
| FR1 Anaerobic pond                            | -                                       | -    | 2.00E-07 | 0.6  | 30000 | -                                                   | - | 0.02 | 0.4 |
| FR2 Constructed wetland                       | -                                       | -    | 3.00E-06 | -0.3 | 85000 | -                                                   | - | 0.01 | 0.4 |

**Table S2.** Unit area per treatment process and GHG emission/credit parameters used in SETA

| Unitary Processes                                             | Area (m <sup>2</sup> /inhab) | GHG Emission debit |                                       |                        |                         |       | GHG Emission credit |           |
|---------------------------------------------------------------|------------------------------|--------------------|---------------------------------------|------------------------|-------------------------|-------|---------------------|-----------|
|                                                               |                              | Pop1 - Pop3        | Sc.1: CO <sub>2</sub>                 | Sc. 1: CH <sub>4</sub> | Sc. 1: N <sub>2</sub> O | Sc. 2 | Sc. 3               | Sc. 1 & 3 |
| W1 Septic tank                                                | 0.02                         |                    | 0                                     | 2                      | 1                       | 0     | 0                   | 0         |
| W2 Imhoff tank                                                | 0.02                         |                    | 0                                     | 2                      | 1                       | 0     | 0                   | 0         |
| W3 Primary clarifier                                          | 0.02                         |                    | 0                                     | 2                      | 1                       | 0     | 0                   | 0         |
| W4 UASB reactor                                               | 0.12                         |                    | 0                                     | 2                      | 1                       | 0     | 0                   | 0         |
| W5 Trickling filter (low rate)                                | 0.05                         |                    | 0                                     | 1                      | 1                       | 2     | 2                   | 0         |
| W6 Trickling filter (medium-high rate)                        | 0.05                         |                    | 0                                     | 1                      | 1                       | 2     | 2                   | 0         |
| W7 Activated sludge reactor (extended aeration)               | 0.12                         |                    | 0                                     | 1                      | 1                       | 2     | 1                   | 0         |
| W8 Activated sludge reactor (conventional-high rate aeration) | 0.12                         |                    | 0                                     | 1                      | 1                       | 2     | 1                   | 0         |
| W9 Combined reactor for nitrification/denitrification         | 0.15                         |                    | 0                                     | 1                      | 1                       | 2     | 1                   | 0         |
| W10 Anoxic + Aeration tank                                    | 0.13                         |                    | 0                                     | 1                      | 1                       | 2     | 1                   | 0         |
| W11 Anaerobic pond                                            | 0.13                         |                    | 0                                     | 1                      | 1                       | 0     | 0                   | 0         |
| W12 Facultative pond                                          | 1.50 - 0.90                  |                    | 0                                     | 1                      | 1                       | 2     | 0                   | 0         |
| W13 Aerated pond                                              | 1.50 - 0.90                  |                    | 0                                     | 1                      | 1                       | 2     | 0                   | 0         |
| W14 Settling pond                                             | 0.05                         |                    | 0                                     | 1                      | 1                       | 0     | 0                   | 0         |
| W15 Anaerobic + Facultative pond                              | 0.88 - 0.55                  |                    | 0                                     | 1                      | 1                       | 2     | 0                   | 0         |
| W16 Anaerobic + Aerated pond                                  | 0.88 - 0.55                  |                    | 0                                     | 1                      | 1                       | 2     | 0                   | 0         |
| W17 Facultative pond + Floating macrophytes                   | 1.50 - 0.90                  |                    | 0                                     | 1                      | 1                       | 1     | 1                   | 0         |
| W18 Constructed wetland                                       | 0.63                         |                    | 0                                     | 1                      | 1                       | 1     | 1                   | 2         |
| W19 Secondary clarifier                                       | 0.03                         |                    | <i>(included in aeration process)</i> |                        |                         |       |                     |           |
| W20 Fine/Micro Stepscreen + chlorine disinfection             | < 0.01                       |                    | 0                                     | 0                      | 0                       | 1     | 0                   | 2         |
| W21 Maturation pond                                           | 0.63 - 0.13                  |                    | 0                                     | 1                      | 1                       | 1     | 1                   | 2         |
| W22 Soil infiltration                                         | 0.01                         |                    | 0                                     | 1                      | 2                       | 0     | 0                   | 0         |

| Unitary Processes                             | Area<br>(m <sup>2</sup> /inhab) | GHG Emission debit |                          |                           |                            |       | GHG Emission credit |           |
|-----------------------------------------------|---------------------------------|--------------------|--------------------------|---------------------------|----------------------------|-------|---------------------|-----------|
|                                               |                                 | Pop1 - Pop3        | Sc.1:<br>CO <sub>2</sub> | Sc. 1:<br>CH <sub>4</sub> | Sc. 1:<br>N <sub>2</sub> O | Sc. 2 | Sc. 3               | Sc. 1 & 3 |
| WS1 Gravity sludge thickener                  | 0.01                            | 0                  | 2                        | 1                         | 1                          | 1     | 0                   | 0         |
| WS2 Chemical sludge stabilization             | 0.01                            | 1                  | 1                        | 1                         | 2                          | 2     | 0                   | 0         |
| WS3 Mechanical dewatering                     | < 0.01                          | 0                  | 0                        | 0                         | 1                          | 0     | 0                   | 0         |
| WS4 Drying bed                                | 0.04                            | 0                  | 1                        | 1                         | 1                          | 1     | 0                   | 0         |
| FS1 Anaerobic pond/tank                       | 0.06-0.03                       | 0                  | 1                        | 1                         | 1                          | 1     | 0                   | 0         |
| FS2 Underground sludge reception tank         | 0.01 - 0.002                    | 0                  | 0                        | 0                         | 1                          | 1     | 0                   | 0         |
| FS3 Drying bed                                | 0.04 - 0.01                     | 0                  | 1                        | 1                         | 1                          | 1     | 0                   | 0         |
| FS4 Sludge composting hangar                  | 0.02 - 0.01                     | 0                  | 0                        | 0                         | 1                          | 1     | 0                   | 0         |
| FS5 Chemical sludge stabilization             | < 0.01                          | 2                  | 1                        | 1                         | 2                          | 2     | 0                   | 0         |
| FS6 Gravity thickener + mechanical dewatering | < 0.01                          | 0                  | 0                        | 0                         | 1                          | 0     | 0                   | 0         |
| FR1 Anaerobic pond                            | 0.06 - 0.03                     | 0                  | 1                        | 1                         | 0                          | 0     | 0                   | 0         |
| FR2 Constructed wetland                       | 0.02 - 0.05                     | 0                  | 1                        | 1                         | 1                          | 1     | 2                   | 0         |

**Table S3.** Overall TA performance for A1 GHG emission/credit parameters

| Individual UP GHG score | Overall solution (TA) score | Description                                             |
|-------------------------|-----------------------------|---------------------------------------------------------|
| 0                       | 7-12                        | (N) Processes with negligible GHG emissions             |
| 1                       | 13-18                       | (O) Processes with minor GHG emissions                  |
| 2                       | 19-24                       | (+) Emissions/Credits with minor to medium significance |
| 3                       | 25-30                       | (++) Significant emissions/credits                      |

**Table S4.** Energy consumption per unit operation used in SETA

| Unitary Processes                               | Energy use (kWh/m <sup>3</sup> ) |      |      |
|-------------------------------------------------|----------------------------------|------|------|
|                                                 | Pop1                             | Pop2 | Pop3 |
| W1 Septic tank                                  | 0.00                             | 0.00 | 0.00 |
| W2 Imhoff tank                                  | 0.00                             | 0.00 | 0.00 |
| W3 Primary clarifier                            | 0.00                             | 0.07 | 0.07 |
| W4 UASB reactor                                 | 0.07                             | 0.07 | 0.07 |
| W5 Trickling filter (low rate)                  | 1.83                             | 0.42 | 0.42 |
| W6 Trickling filter (medium-high rate)          | 1.46                             | 0.34 | 0.34 |
| W7 Activated sludge reactor (extended aeration) | 1.90                             | 1.06 | 1.06 |

|                                                               |      |      |      |
|---------------------------------------------------------------|------|------|------|
| W8 Activated sludge reactor (conventional-high rate aeration) | 1.50 | 0.69 | 0.69 |
| W9 Combined reactor for nitrification/denitrification         | 1.90 | 1.06 | 1.06 |
| W10 Anoxic + Aeration tank                                    | 1.90 | 1.06 | 1.06 |
| W11 Anaerobic pond                                            | 0.00 | 0.00 | 0.00 |
| W12 Facultative pond                                          | 0.59 | 0.13 | 0.13 |
| W13 Aerated pond                                              | 1.17 | 0.27 | 0.27 |
| W14 Settling pond                                             | 0.00 | 0.00 | 0.00 |
| W15 Anaerobic + Facultative pond                              | 0.29 | 0.07 | 0.07 |
| W16 Anaerobic + Aerated pond                                  | 0.59 | 0.13 | 0.13 |
| W17 Facultative pond + Floating macrophytes                   | 0.29 | 0.13 | 0.13 |
| W18 Constructed wetland                                       | 0.00 | 0.00 | 0.00 |
| W19 Secondary clarifier                                       | 0.22 | 0.15 | 0.15 |
| W20 Fine/Micro Stepscreen + chlorine disinfection             | 0.10 | 0.06 | 0.06 |
| W21 Maturation pond                                           | 0.00 | 0.00 | 0.00 |
| W22 Soil infiltration                                         | 0.00 | 0.00 | 0.00 |
| WS1 Gravity sludge thickener                                  | 0.09 | 0.06 | 0.06 |
| WS2 Chemical sludge stabilization                             | 0.04 | 0.03 | 0.03 |
| WS3 Mechanical dewatering                                     | 0.09 | 0.06 | 0.06 |
| WS4 Drying bed                                                | 0.00 | 0.00 | 0.00 |
| FS1 Anaerobic pond/tank                                       | 0.45 | 0.29 | 0.29 |
| FS2 Underground sludge reception tank                         | 0.45 | 0.29 | 0.29 |
| FS3 Drying bed                                                | 0.00 | 0.00 | 0.00 |
| FS4 Sludge composting hangar                                  | 0.00 | 0.00 | 0.00 |
| FS5 Chemical sludge stabilization                             | 0.00 | 0.00 | 0.00 |
| FS6 Gravity thickener + mechanical dewatering                 | 0.09 | 0.06 | 0.03 |
| FR1 Anaerobic pond                                            | 0.00 | 0.00 | 0.00 |
| FR2 Constructed wetland                                       | 0.00 | 0.00 | 0.00 |
